# Supplementary material for: Whole-Genome Sequencing of a Colistin-Resistant Acinetobacter baumannii Strain Isolated at a Tertiary Health Facility in Pretoria, South Africa
Source: MDPI journal article supplement (doi:10.3390/antibiotics11050594), 2022-04-28
Supplement: s1 [file s1]

## Supplementary Materials

**Table S1:** Primers sequences used for PCR

| PRIMERS                  | SEQUENCES                                    | GENES     | SIZES<br>[REFERENCES] |
|--------------------------|----------------------------------------------|-----------|-----------------------|
| OXA-51 for<br>OXA-51 rev | TAATGCTTTGATCGGCCTTG<br>TGGATTGCACTTCATCTTGG | blaOXA-51 | 353bp [1]             |
| AdeB for<br>AdeB rev     | TTAACGATAGCGTTGTAACC<br>TGAGCAGACAATGGAATAGT | AdeB      | 541bp [2]             |
| AdeR for<br>AdeR rev     | ACTACGATATTGGCGACATT<br>GCGTCAGATTAAGCAAGATT | AdeR      | 447bp [2]             |
| AdeS for<br>AdeS rev     | TTGGTTAGCCACTGTTATCT<br>AGTGGACGTTAGGTCAAGTT | AdeS      | 544bp [2]             |
| MCR for<br>MCR rev       | CGGTCAGTCCGTTTGTTTC<br>CTTGGTCGGTCTGTAGGG    | mcr-1     | 309bp [3]             |

**Table S2:** Thermocycling condition used in the study

| TARGETED GENES                 | THERMOCYCLING CONDITION                                                                                                                                      | POSITIVE CONTROL                                                                                                                              |
|--------------------------------|--------------------------------------------------------------------------------------------------------------------------------------------------------------|-----------------------------------------------------------------------------------------------------------------------------------------------|
| <i>bla<sub>OXA-51</sub></i>    | 94 °C for 4 min<br><br>35 X $\begin{cases} 94\text{ °C for 30 sec} \\ 50\text{ °C for 30 sec} \\ 72\text{ °C for 1 min} \end{cases}$<br><br>72 °C for 90 sec | <i>A. baumannii</i> ATCC® BAA-1605™ strain<br><br><i>K. pneumoniae</i> ATCC 8303 [Klebsiella pneumoniae carbapenemase (KPC) positive control] |
| <i>adeS</i><br><br><i>adeR</i> | 94 °C for 5 min<br><br>30 X $\begin{cases} 94\text{ °C for 1 min} \\ 57\text{ °C for 1 min} \\ 72\text{ °C for 1 min} \end{cases}$<br><br>72 °C for 5 min    | <i>K. pneumoniae</i> ATCC BAA-2146 [New Delhi metallo-β-lactamase (NDM) positive control]                                                     |
| <i>adeB</i>                    | 94 °C for 5 min<br><br>30 X $\begin{cases} 94\text{ °C for 1 min} \\ 57\text{ °C for 1 min} \\ 72\text{ °C for 1 min} \end{cases}$<br><br>72 °C for 5 min    |                                                                                                                                               |
|                                | RT-PCR                                                                                                                                                       |                                                                                                                                               |
| <i>mcr-1</i>                   | 95 °C for 5 min<br><br>35 X $\begin{cases} 95\text{ °C for 30s} \\ 61.2\text{ °C for 40s} \\ 72\text{ °C for 40s} \end{cases}$<br><br>70 °C for 10 min       | N/A                                                                                                                                           |

\*min: Minute (s)

\*sec: Second (s)

\*N/A: Not applicable

## REFERENCES

- 1 Kock MM, Bellomo AN, Storm N, Ehlers MM. Prevalence of carbapenem resistance genes in *Acinetobacter baumannii* isolated from clinical specimens obtained from an academic hospital in South Africa. *Southern African Journal of Epidemiology and Infection*. 2013 Jan 1;28(1):28-32. <https://doi.org/10.1080/10158782.2013.11441516>
- 2 Beheshti M, Talebi M, Ardebili A, Bahador A, Lari AR. Detection of AdeABC efflux pump genes in tetracycline-resistant *Acinetobacter baumannii* isolates from burn and ventilator-associated pneumonia patients. *Journal of pharmacy & bioallied sciences*. 2014 Oct;6(4):229. doi: 10.4103/0975-7406.142949
- 3 Hazrat B, Fareeha H, Muhammad KA, Sabir K, Xingyuan Y, Tayyab RU. Detection of mcr-1 gene in extended-spectrum  $\beta$ -lactamase-producing *Klebsiella pneumoniae* from human urine samples in Pakistan. *Jundishapur Journal of Microbiology*. 2020; 13(4), pp. 1–6. doi: 10.5812/jjm.96646.
